# Supplementary material for: Science through Wikipedia: A novel representation of open knowledge through co-citation networks
Source: PubMed Central journal article supplement (PMC7010282; doi:10.1371/journal.pone.0228713), 2020-02-10
Supplement: pone.0228713.s001.pdf [file pone.0228713.s001.pdf]

## Descriptive statistics of references made by Wikipedia entries and citations that scientific articles receive from Wikipedia entries by main fields

| Main field                                   | Descriptive statistics of references made by Wikipedia entries to articles by main field |                      |                                  |        |       | Descriptive statistics of citations that scientific articles receive from Wikipedia entries by main fields |                      |                                  |        |       |
|----------------------------------------------|------------------------------------------------------------------------------------------|----------------------|----------------------------------|--------|-------|------------------------------------------------------------------------------------------------------------|----------------------|----------------------------------|--------|-------|
|                                              | Wikipedia entries                                                                        | References (% total) | Mean ( $\pm$ standard deviation) | Median | Range | Articles                                                                                                   | References (% total) | Mean ( $\pm$ standard deviation) | Median | Range |
| Agricultural and Biological Sciences         | 58 489                                                                                   | 126 377 (14.91%)     | 2.16 ( $\pm$ 3.85)               | 1      | 241   | 80 786                                                                                                     | 126 377 (14.91%)     | 1.56 ( $\pm$ 5.67)               | 1      | 927   |
| Arts and Humanities                          | 28 223                                                                                   | 46 487 (5.49%)       | 1.65 ( $\pm$ 1.80)               | 1      | 55    | 36 199                                                                                                     | 46 487 (5.49%)       | 1.28 ( $\pm$ 1.19)               | 1      | 107   |
| Biochemistry, Genetics and Molecular Biology | 64 945                                                                                   | 266 956 (31.50%)     | 4.11 ( $\pm$ 6.10)               | 2      | 185   | 181 954                                                                                                    | 266 956 (31.50%)     | 1.47 ( $\pm$ 11.77)              | 1      | 3591  |
| Business, Management and Accounting          | 4 127                                                                                    | 7 416 (0.88%)        | 1.80 ( $\pm$ 2.36)               | 1      | 71    | 6 325                                                                                                      | 7 416 (0.88%)        | 1.17 ( $\pm$ 0.62)               | 1      | 15    |
| Chemical Engineering                         | 9 397                                                                                    | 17 791 (2.10%)       | 1.89 ( $\pm$ 2.37)               | 1      | 38    | 14 002                                                                                                     | 17 791 (2.10%)       | 1.27 ( $\pm$ 2.88)               | 1      | 205   |
| Chemistry                                    | 17 381                                                                                   | 43 262 (5.10%)       | 2.49 ( $\pm$ 3.80)               | 1      | 101   | 34 889                                                                                                     | 43 262 (5.10%)       | 1.24 ( $\pm$ 1.20)               | 1      | 124   |
| Computer Science                             | 9 286                                                                                    | 16 874 (1.99%)       | 1.82 ( $\pm$ 2.13)               | 1      | 60    | 13 631                                                                                                     | 16 874 (1.99%)       | 1.24 ( $\pm$ 0.75)               | 1      | 15    |
| Decision Sciences                            | 2 605                                                                                    | 4 159 (0.49%)        | 1.60 ( $\pm$ 1.63)               | 1      | 29    | 3 420                                                                                                      | 4 159 (0.49%)        | 1.22 ( $\pm$ 0.65)               | 1      | 14    |
| Dentistry                                    | 992                                                                                      | 2 407 (0.28%)        | 2.43 ( $\pm$ 3.50)               | 1      | 43    | 2 116                                                                                                      | 2 407 (0.28%)        | 1.14 ( $\pm$ 0.52)               | 1      | 7     |
| Earth and Planetary Sciences                 | 24 663                                                                                   | 63 525 (7.50%)       | 2.58 ( $\pm$ 5.05)               | 1      | 264   | 33 875                                                                                                     | 63 525 (7.50%)       | 1.88 ( $\pm$ 14.70)              | 1      | 1 483 |
| Economics, Econometrics and Finance          | 4 818                                                                                    | 9 915 (1.17%)        | 2.06 ( $\pm$ 3.06)               | 1      | 89    | 7 775                                                                                                      | 9 915 (1.17%)        | 1.28 ( $\pm$ 1.46)               | 1      | 107   |
| Energy                                       | 2 122                                                                                    | 3 615 (0.43%)        | 1.70 ( $\pm$ 1.98)               | 1      | 28    | 2 957                                                                                                      | 3 615 (0.43%)        | 1.22 ( $\pm$ 0.82)               | 1      | 18    |
| Engineering                                  | 11 135                                                                                   | 19 027 (2.25%)       | 1.71 ( $\pm$ 2.13)               | 1      | 42    | 14 940                                                                                                     | 19 027 (2.25%)       | 1.27 ( $\pm$ 2.78)               | 1      | 205   |
| Environmental Science                        | 17 516                                                                                   | 30 653 (3.62%)       | 1.75 ( $\pm$ 2.11)               | 1      | 67    | 22 990                                                                                                     | 30 653 (3.62%)       | 1.33 ( $\pm$ 1.70)               | 1      | 158   |
| Health Professions                           | 3 177                                                                                    | 5 762 (0.68%)        | 1.81 ( $\pm$ 2.29)               | 1      | 46    | 4 882                                                                                                      | 5 762 (0.68%)        | 1.18 ( $\pm$ 0.58)               | 1      | 13    |

|                                            |        |                     |                  |   |     |         |                     |                   |   |      |
|--------------------------------------------|--------|---------------------|------------------|---|-----|---------|---------------------|-------------------|---|------|
| Immunology and Microbiology                | 24 824 | 54 128<br>(6.39%)   | 2.18<br>(± 2.99) | 1 | 80  | 39 890  | 54 128<br>(6.39%)   | 1.36<br>(± 3.05)  | 1 | 460  |
| Materials Science                          | 5783   | 13 253<br>(1.56%)   | 2.29<br>(± 3.45) | 1 | 60  | 11 342  | 13 253<br>(1.56%)   | 1.17<br>(± 0.57)  | 1 | 11   |
| Mathematics                                | 10 891 | 20 672<br>(2.44%)   | 1.90<br>(± 2.43) | 1 | 67  | 16 458  | 20 672<br>(2.44%)   | 1.26<br>(± 3.66)  | 1 | 460  |
| Medicine                                   | 72 384 | 276 125<br>(32.58%) | 3.81<br>(± 6.83) | 2 | 221 | 206 576 | 276 125<br>(32.58%) | 1.34<br>(± 9.48)  | 1 | 3591 |
| Multidisciplinary                          | 33 943 | 72 346<br>(8.54%)   | 2.13<br>(± 2.72) | 1 | 99  | 38 422  | 72 346<br>(8.54%)   | 1.88<br>(± 26.40) | 1 | 4997 |
| Neuroscience                               | 15 588 | 41 771<br>(4.93%)   | 2.68<br>(± 4.05) | 1 | 89  | 32 760  | 41 771<br>(4.93%)   | 1.28<br>(± 1.06)  | 1 | 61   |
| Nursing                                    | 4855   | 8856<br>(1.04%)     | 1.82<br>(± 2.14) | 1 | 31  | 7232    | 8856<br>(1.04%)     | 1.22<br>(± 0.78)  | 1 | 33   |
| Pharmacology, Toxicology and Pharmaceutics | 14 706 | 33 758<br>(3.98%)   | 2.30<br>(± 3.00) | 1 | 75  | 26 578  | 33 758<br>(3.98%)   | 1.27<br>(± 1.00)  | 1 | 55   |
| Physics and Astronomy                      | 21 829 | 64 001<br>(7.55%)   | 2.93<br>(± 4.42) | 1 | 115 | 37 768  | 64 001<br>(7.55%)   | 1.69<br>(± 13.90) | 1 | 1483 |
| Psychology                                 | 9235   | 34 051<br>(4.02%)   | 3.69<br>(± 6.24) | 1 | 109 | 27 033  | 34 051<br>(4.02%)   | 1.26<br>(± 0.94)  | 1 | 87   |
| Social Sciences                            | 33 104 | 61 986<br>(7.31%)   | 1.87<br>(± 2.40) | 1 | 56  | 48 877  | 61 986<br>(7.31%)   | 1.27<br>(± 0.96)  | 1 | 84   |
| Veterinary                                 | 2314   | 4403<br>(0.52%)     | 1.90<br>(± 2.47) | 1 | 56  | 3719    | 4403<br>(0.52%)     | 1.18<br>(± 0.66)  | 1 | 16   |
