# Supplementary material for: Science through Wikipedia: A novel representation of open knowledge through co-citation networks
Source: PubMed Central journal article supplement (PMC7010282; doi:10.1371/journal.pone.0228713), 2020-02-10
Supplement: pone.0228713.s002.pdf [file pone.0228713.s002.pdf]

## Most cited articles in Wikipedia

|   | Article                                                                                                                                                                                                                                                                    | Main fields                    | Wikipedia citations | Scopus citations | Difference |
|---|----------------------------------------------------------------------------------------------------------------------------------------------------------------------------------------------------------------------------------------------------------------------------|--------------------------------|---------------------|------------------|------------|
| 1 | Mammalian Gene Collection (MGC) Program Team. (2002). Generation and initial analysis of more than 15,000 full-length human and mouse cDNA sequences. <i>Proceedings of the National Academy of Sciences</i> , 99(26), 16899-16903.                                        | Biology / Genetics             | 4997                | 1288             | 3709       |
| 2 | Gerhard, D. S., Wagner, L., Feingold, E. A., Shenmen, C. M., Grouse, L. H., Schuler, G., ... & Guyer, M. (2004). The status, quality, and expansion of the NIH full-length cDNA project: the Mammalian Gene Collection (MGC). <i>Genome research</i> , 14(10B), 2121-2127. | Biology / Genetics             | 3591                | 341              | 3250       |
| 3 | Ota, T., Suzuki, Y., Nishikawa, T., Otsuki, T., Sugiyama, T., Irie, R., ... & Kimura, K. (2004). Complete sequencing and characterization of 21,243 full-length human cDNAs. <i>Nature genetics</i> , 36(1), 40.                                                           | Biology / Genetics             | 2346                | 529              | 1817       |
| 4 | Van Leeuwen, F. (2007). Validation of the new Hipparcos reduction. <i>Astronomy &amp; Astrophysics</i> , 474(2), 653-664.                                                                                                                                                  | Astronomy                      | 1483                | 2055             | -572       |
| 5 | Menzel, D. H., Minnaert, M., Levin, B., Dollfus, A., & Bell, B. (1971). Report on lunar nomenclature by the working group of Commission 17 of the IAU. <i>Space Science Reviews</i> , 12(2), 136-186.                                                                      | Astronomy                      | 1450                | 6                | 1444       |
| 6 | Kazuo, M., & Sumio, S. (1994). Oligo-capping: a simple method to replace the cap structure of eukaryotic mRNAs with oligoribonucleotides. <i>Gene</i> , 138(1-2), 171-174.                                                                                                 | Health Sciences / Microbiology | 1019                | 486              | 533        |
| 7 | Rual, J. F., Venkatesan, K., Hao, T., Hirozane-Kishikawa, T., Dricot, A., Li, N., ... & Klitgord, N. (2005). Towards a proteome-scale map of the human protein-protein interaction network. <i>Nature</i> , 437(7062), 1173.                                               | Biology / Biochemistry         | 986                 | 1783             | -797       |
| 8 | Suzuki, Y., Yoshitomo-Nakagawa, K., Maruyama, K., Suyama, A., & Sugano, S. (1997). Construction and characterization of a full length-enriched and a 5'-end-enriched cDNA library. <i>Gene</i> , 200(1-2), 149-156.                                                        | Biology / Genetics             | 983                 | 223              | 760        |

|    |                                                                                                                                                                                                                                                                                               |                                                    |     |      |       |
|----|-----------------------------------------------------------------------------------------------------------------------------------------------------------------------------------------------------------------------------------------------------------------------------------------------|----------------------------------------------------|-----|------|-------|
| 9  | Sihvonen, P. (2005). Phylogeny and classification of the Scopulini moths (Lepidoptera: Geometridae, Sterrhinae). <i>Zoological Journal of the Linnean Society</i> , 143(4), 473-530.                                                                                                          | Biology / Genetics                                 | 927 | 25   | 902   |
| 10 | Vereš, P., Jedicke, R., Fitzsimmons, A., Denneau, L., Granvik, M., Bolin, B., ... & Flewelling, H. (2015). Absolute magnitudes and slope parameters for 250,000 asteroids observed by Pan-STARRS PS1—Preliminary results. <i>Icarus</i> , 261, 34-47.                                         | Information Science and Computational Science / AI | 923 | 21   | 902   |
| 11 | Mainzer, A., Grav, T., Masiero, J., Hand, E., Bauer, J., Tholen, D., ... & Watkins, J. (2011). NEOWISE studies of spectrophotometrically classified asteroids: Preliminary results. <i>The Astrophysical Journal</i> , 741(2), 90.                                                            | Information Science and Computational Science / AI | 874 | 56   | 818   |
| 12 | Welch, J. J. (2010). The "Island Rule" and deep-sea gastropods: Re-examining the evidence. <i>PloS one</i> , 5(1), e8776.                                                                                                                                                                     | Natural Science and Biology                        | 654 | 9    | 645   |
| 13 | Olsen, J. V., Blagoev, B., Gnad, F., Macek, B., Kumar, C., Mortensen, P., & Mann, M. (2006). Global, in vivo, and site-specific phosphorylation dynamics in signaling networks. <i>Cell</i> , 127(3), 635-648.                                                                                | Biology / Biochemistry                             | 622 | 2232 | -1610 |
| 14 | Kimura, K., Wakamatsu, A., Suzuki, Y., Ota, T., Nishikawa, T., Yamashita, R., ... & Ishii, S. (2006). Diversification of transcriptional modulation: large-scale identification and characterization of putative alternative promoters of human genes. <i>Genome research</i> , 16(1), 55-65. | Biology / Genetics                                 | 585 | 289  | 296   |
| 15 | Masiero, J. R., Mainzer, A. K., Grav, T., Bauer, J. M., Cutri, R. M., Nugent, C., & Cabrera, M. S. (2012). Preliminary analysis of WISE/NEOWISE 3-band cryogenic and post-cryogenic observations of main belt asteroids. <i>The Astrophysical Journal Letters</i> , 759(1), L8.               | Physics                                            | 533 | 32   | 501   |
| 16 | Bonaldo, M. D. F., Lennon, G., & Soares, M. B. (1996). Normalization and subtraction: two approaches to facilitate gene discovery. <i>Genome research</i> , 6(9), 791-806.                                                                                                                    | Biology / Genetics                                 | 518 | 442  | 76    |
| 17 | Hartley, J. L., Temple, G. F., & Brasch, M. A. (2000). DNA cloning using in vitro site-specific recombination. <i>Genome research</i> , 10(11), 1788-1795.                                                                                                                                    | Biology / Genetics                                 | 507 | 642  | -135  |

|    |                                                                                                                                                                                                                                                                               |                        |     |     |     |
|----|-------------------------------------------------------------------------------------------------------------------------------------------------------------------------------------------------------------------------------------------------------------------------------|------------------------|-----|-----|-----|
| 18 | Masiero, J. R., Grav, T., Mainzer, A. K., Nugent, C. R., Bauer, J. M., Stevenson, R., & Sonnett, S. (2014). Main-belt asteroids with WISE/NEOWISE: Near-infrared albedos. <i>The Astrophysical Journal</i> , 791(2), 121.                                                     | Physics                | 501 | 27  | 474 |
| 19 | Nielsen, E. S., Robinson, G. S., & Wagner, D. L. (2000). Ghost-moths of the world: a global inventory and bibliography of the Exoporia (Mnesarchaeoidea and Hepialoidea)(Lepidoptera). <i>Journal of Natural History</i> , 34(6), 823-878.                                    | Biology / Ecology      | 491 | 41  | 450 |
| 20 | Wiemann, S., Weil, B., Wellenreuther, R., Gassenhuber, J., Glassl, S., Ansorge, W., ... & Lauber, J. (2001). Toward a catalog of human genes and proteins: sequencing and analysis of 500 novel complete protein coding human cDNAs. <i>Genome Research</i> , 11(3), 422-435. | Biology / Biochemistry | 472 | 155 | 317 |
