# Supplementary material for: Science through Wikipedia: A novel representation of open knowledge through co-citation networks
Source: PubMed Central journal article supplement (PMC7010282; doi:10.1371/journal.pone.0228713), 2020-02-10
Supplement: pone.0228713.s003.pdf [file pone.0228713.s003.pdf]

## Most cited journals in Wikipedia

|    | Journal                                                                         | Articles | Citations | References/<br>articles | Open<br>Access | Area                            |
|----|---------------------------------------------------------------------------------|----------|-----------|-------------------------|----------------|---------------------------------|
| 1  | Nature                                                                          | 13 312   | 26 434    | 1.986                   | No             | Multidisciplinary               |
| 2  | Proceedings of the National Academy of Sciences of the United States of America | 12 234   | 24 104    | 1.970                   | No             | Multidisciplinary               |
| 3  | Journal of Biological Chemistry                                                 | 16 611   | 21 921    | 1.320                   | No             | Life Sciences                   |
| 4  | Science                                                                         | 10 191   | 17 853    | 1.752                   | No             | Multidisciplinary               |
| 5  | PLoS ONE                                                                        | 5793     | 9603      | 1.658                   | Yes            | Health Sciences/Life Sciences   |
| 6  | Genome Research                                                                 | 613      | 8839      | 1.419                   | No             | Health Sciences/Life Sciences   |
| 7  | Astrophysical Journal                                                           | 3722     | 8552      | 2.298                   | No             | Physical Sciences               |
| 8  | Cell                                                                            | 3673     | 7223      | 1.967                   | No             | Life Sciences                   |
| 9  | Astronomy and Astrophysics                                                      | 1584     | 5546      | 3.501                   | No             | Physical Sciences               |
| 10 | Journal of the American Chemical Society                                        | 4549     | 5529      | 1.215                   | No             | Life Sciences/Physical Sciences |
| 11 | Gene                                                                            | 1848     | 5468      | 2.959                   | No             | Health Sciences/Life Sciences   |
| 12 | New England Journal of Medicine                                                 | 3628     | 5045      | 1.391                   | No             | Health Sciences                 |
| 13 | Nature Genetics                                                                 | 1618     | 4853      | 2.999                   | No             | Life Sciences                   |
| 14 | Genomics                                                                        | 2766     | 4685      | 1.694                   | No             | Life Sciences                   |
| 15 | The Lancet                                                                      | 3000     | 4634      | 1.545                   | No             | Health Sciences                 |
| 16 | Nucleic Acids Research                                                          | 2928     | 4570      | 1.561                   | Yes            | Life Sciences                   |
| 17 | Biochemical and Biophysical Research Communications                             | 3584     | 4425      | 1.235                   | No             | Life Sciences                   |
| 18 | Physical Review Letters                                                         | 3037     | 4262      | 1403                    | No             | Physical Sciences               |
| 19 | International Journal of Systematic and Evolutionary Microbiology               | 2791     | 4120      | 1,476                   | No             | Health Sciences/Life Sciences   |
| 20 | Biochemistry                                                                    | 3307     | 3886      | 1.175                   | No             | Life Sciences                   |
