# Supplementary material for: Science through Wikipedia: A novel representation of open knowledge through co-citation networks
Source: PubMed Central journal article supplement (PMC7010282; doi:10.1371/journal.pone.0228713), 2020-02-10
Supplement: pone.0228713.s004.pdf [file pone.0228713.s004.pdf]

## Main journals by measures of centrality in full co-citation network, co-citation PFNET and filtered co-citation PFNET

|                                 | Degree                                                                                             | Betweenness                                                                                         | Closeness                                                                                           | Eigenvector                                                                                         |
|---------------------------------|----------------------------------------------------------------------------------------------------|-----------------------------------------------------------------------------------------------------|-----------------------------------------------------------------------------------------------------|-----------------------------------------------------------------------------------------------------|
| <b>Full co-citation network</b> |                                                                                                    |                                                                                                     |                                                                                                     |                                                                                                     |
| 1                               | Science<br>(7119)                                                                                  | Science<br>(0.093)                                                                                  | Science<br>(0.671)                                                                                  | Science<br>(1.0)                                                                                    |
| 2                               | Nature<br>(7052)                                                                                   | Nature<br>(0.092)                                                                                   | Nature<br>(0.668)                                                                                   | Proceedings of the<br>National Academy of<br>Sciences of the United<br>States of America<br>(0.998) |
| 3                               | Proceedings of the<br>National Academy of<br>Sciences of the United<br>States of America<br>(6901) | Proceedings of the<br>National Academy of<br>Sciences of the United<br>States of America<br>(0.079) | Proceedings of the<br>National Academy of<br>Sciences of the United<br>States of America<br>(0.662) | Nature<br>(0.996)                                                                                   |
| 4                               | PLoS ONE<br>(6561)                                                                                 | PLoS ONE<br>(0.068)                                                                                 | PLoS ONE<br>(0.650)                                                                                 | PLoS ONE<br>(0.982)                                                                                 |
| 5                               | The Lancet<br>(5024)                                                                               | The Lancet<br>(0.031)                                                                               | The Lancet<br>(0.598)                                                                               | New England Journal of<br>Medicine<br>(0.883)                                                       |
| 6                               | New England Journal of<br>Medicine<br>(4991)                                                       | New England Journal of<br>Medicine<br>(0.028)                                                       | New England Journal of<br>Medicine<br>(0.595)                                                       | The Lancet<br>(0.874)                                                                               |
| 7                               | JAMA - Journal of the<br>American Medical<br>Association<br>(4200)                                 | JAMA - Journal of the<br>American Medical<br>Association<br>(0.018)                                 | JAMA - Journal of the<br>American Medical<br>Association<br>(0.573)                                 | JAMA - Journal of the<br>American Medical<br>Association<br>(0.798)                                 |
| 8                               | Scientific Reports<br>(3778)                                                                       | Scientific Reports<br>(0.015)                                                                       | Scientific Reports<br>(0.563)                                                                       | Journal of Biological<br>Chemistry<br>(0.761)                                                       |
| 9                               | Journal of Biological<br>Chemistry<br>(3574)                                                       | Lecture Notes in<br>Computer Science<br>(0.010)                                                     | Journal of Biological<br>Chemistry<br>(0.549)                                                       | Scientific Reports<br>(0.727)                                                                       |
| 10                              | Cochrane Database of<br>Systematic Reviews<br>(3410)                                               | Scientific American<br>(0.010)                                                                      | Annals of the New York<br>Academy of Sciences<br>(0.545)                                            | Cell<br>(0.723)                                                                                     |
| <b>Co-citation PFNET</b>        |                                                                                                    |                                                                                                     |                                                                                                     |                                                                                                     |
| 1                               | Proceedings of the<br>National Academy of<br>Sciences of the United<br>States of America<br>(1604) | Proceedings of the<br>National Academy of<br>Sciences of the United<br>States of America<br>(0.198) | Proceedings of the<br>National Academy of<br>Sciences of the United<br>States of America<br>(0.433) | Proceedings of the<br>National Academy of<br>Sciences of the United<br>States of America<br>(1.0)   |
| 2                               | Nature<br>(1431)                                                                                   | Nature<br>(0.176)                                                                                   | Nature<br>(0.426)                                                                                   | Nature<br>(0.883)                                                                                   |

|                                   |                                                                                                   |                                                                                                     |                                                                                                     |                                                                                                   |
|-----------------------------------|---------------------------------------------------------------------------------------------------|-----------------------------------------------------------------------------------------------------|-----------------------------------------------------------------------------------------------------|---------------------------------------------------------------------------------------------------|
| 3                                 | Science<br>(1253)                                                                                 | Science<br>(0.150)                                                                                  | Science<br>(0.417)                                                                                  | Science<br>(0.774)                                                                                |
| 4                                 | PLoS ONE<br>(911)                                                                                 | PLoS ONE<br>(0.094)                                                                                 | PLoS ONE<br>(0.398)                                                                                 | PLoS ONE<br>(0.555)                                                                               |
| 5                                 | New England Journal of<br>Medicine<br>(844)                                                       | New England Journal of<br>Medicine<br>(0.074)                                                       | Journal of<br>Hydroinformatics<br>(0.388)                                                           | New England Journal<br>of Medicine<br>(0.472)                                                     |
| 6                                 | The Lancet<br>(716)                                                                               | The Lancet<br>(0.056)                                                                               | New England Journal<br>of Medicine<br>(0.385)                                                       | The Lancet<br>(0.396)                                                                             |
| 7                                 | Journal of Biological<br>Chemistry<br>(393)                                                       | JAMA - Journal of the<br>American Medical<br>Association<br>(0.020)                                 | Materials Research<br>Letters<br>(0.384)                                                            | JAMA - Journal of the<br>American Medical<br>Association<br>(0.213)                               |
| 8                                 | JAMA - Journal of the<br>American Medical<br>Association<br>(382)                                 | Journal of Biological<br>Chemistry<br>(0.019)                                                       | Open Neurology<br>Journal<br>(0.372)                                                                | Journal of Biological<br>Chemistry<br>(0.201)                                                     |
| 9                                 | Cochrane Database of<br>Systematic Reviews<br>(306)                                               | Physical Review Letters<br>(0.015)                                                                  | The Lancet<br>(0.372)                                                                               | Cochrane Database of<br>Systematic Reviews<br>(0.167)                                             |
| 10                                | Physical Review Letters<br>(248)                                                                  | Journal of the American<br>Chemical Society<br>(0.0145)                                             | Journal of Sensory<br>Studies<br>(0.370)                                                            | Journal of<br>Hydroinformatics<br>(0.167)                                                         |
| <b>Filtered co-citation PFNET</b> |                                                                                                   |                                                                                                     |                                                                                                     |                                                                                                   |
| 1                                 | Proceedings of the<br>National Academy of<br>Sciences of the United<br>States of America<br>(251) | Proceedings of the<br>National Academy of<br>Sciences of the United<br>States of America<br>(0.881) | Proceedings of the<br>National Academy of<br>Sciences of the United<br>States of America<br>(0.491) | Proceedings of the<br>National Academy of<br>Sciences of the United<br>States of America<br>(1.0) |
| 2                                 | Nature<br>(76)                                                                                    | Nature<br>(0.389)                                                                                   | Nature<br>(0.413)                                                                                   | Nature<br>(0.198)                                                                                 |
| 3                                 | Journal of Biological<br>Chemistry<br>(41)                                                        | Science<br>(0.220)                                                                                  | Cold Spring Harbor<br>Symposia on Quantitative<br>Biology<br>(0.383)                                | Journal of Biological<br>Chemistry<br>(0.112)                                                     |
| 4                                 | Science<br>(33)                                                                                   | New England Journal of<br>Medicine<br>(0.214)                                                       | Neuroscience and<br>Biobehavioral Reviews<br>(0.367)                                                | New England Journal of<br>Medicine<br>(0.103)                                                     |
| 5                                 | New England Journal of<br>Medicine<br>(32)                                                        | Journal of Biological<br>Chemistry<br>(0.120)                                                       | Nature Structural and<br>Molecular Biology<br>(0.366)                                               | Cold Spring Harbor<br>Symposia on Quantitative<br>Biology<br>(0.083)                              |
| 6                                 | Journal of the American<br>Chemical Society<br>(26)                                               | The Lancet<br>(0.087)                                                                               | Annual Review of<br>Entomology<br>(0.358)                                                           | Neuroscience and<br>Biobehavioral Reviews<br>(0.081)                                              |

|    |                                                         |                                                        |                                                        |                                                       |
|----|---------------------------------------------------------|--------------------------------------------------------|--------------------------------------------------------|-------------------------------------------------------|
| 7  | Physical Review Letters<br>(19)                         | Journal of the American<br>Chemical Society<br>(0.081) | New England Journal of<br>Medicine<br>(0.357)          | Nature Structural and<br>Molecular Biology<br>(0.077) |
| 8  | The Lancet<br>(18)                                      | PLoS ONE<br>(0.072)                                    | Journal of Biological<br>Chemistry<br>(0.344)          | PLoS ONE<br>(0.076)                                   |
| 9  | Journal of Personality and<br>Social Psychology<br>(17) | Physical Review Letters<br>(0.063)                     | Journal of the National<br>Cancer Institute<br>(0.343) | Molecular and Cellular<br>Neurosciences<br>(0.070)    |
| 10 | PLoS ONE<br>(15)                                        | Psychological Review<br>(0.059)                        | PLoS ONE<br>(0.338)                                    | Journal of Neuroscience<br>(0.070)                    |
