# Supplementary material for: Science through Wikipedia: A novel representation of open knowledge through co-citation networks
Source: PubMed Central journal article supplement (PMC7010282; doi:10.1371/journal.pone.0228713), 2020-02-10
Supplement: pone.0228713.s005.pdf [file pone.0228713.s005.pdf]

## Descriptive statistics of references made by Wikipedia entries and citations that articles receive from Wikipedia by areas

| Area                         | Descriptive statistics of references made by Wikipedia entries to articles by areas |                      |                                  |        |       | Descriptive statistics of citations that articles receive from Wikipedia entries by areas |                      |                                  |        |       |
|------------------------------|-------------------------------------------------------------------------------------|----------------------|----------------------------------|--------|-------|-------------------------------------------------------------------------------------------|----------------------|----------------------------------|--------|-------|
|                              | Wikipedia entries                                                                   | References (% total) | Mean ( $\pm$ standard deviation) | Median | Range | Articles                                                                                  | References (% total) | Mean ( $\pm$ standard deviation) | Median | Range |
| Health Sciences              | 73 402                                                                              | 282 750 (33.36%)     | 3.85 ( $\pm$ 6.89)               | 2      | 221   | 212 292                                                                                   | 282 750 (33.36%)     | 1.33 ( $\pm$ 9.35)               | 1      | 3591  |
| Life Sciences                | 102 933                                                                             | 414 400 (48.90%)     | 4.03 ( $\pm$ 6.61)               | 2      | 265   | 287 674                                                                                   | 414 400 (48.90%)     | 1.44 ( $\pm$ 9.70)               | 1      | 3591  |
| Multidisciplinary            | 33 943                                                                              | 72 346 (8.54%)       | 2.13 ( $\pm$ 2.72)               | 1      | 99    | 38 422                                                                                    | 72 346 (8.54%)       | 1.88 ( $\pm$ 26.40)              | 1      | 4997  |
| Physical Sciences            | 73 453                                                                              | 195 678 (23.09%)     | 2.66 ( $\pm$ 4.65)               | 1      | 301   | 137 492                                                                                   | 195 678 (23.09%)     | 1.42 ( $\pm$ 7.54)               | 1      | 1483  |
| Social Sciences & Humanities | 49 688                                                                              | 115 947 (13.68%)     | 2.33 ( $\pm$ 3.96)               | 1      | 127   | 91 617                                                                                    | 115 947 (13.68%)     | 1.27 ( $\pm$ 1.01)               | 1      | 107   |
