# Supplementary material for: Science through Wikipedia: A novel representation of open knowledge through co-citation networks
Source: PubMed Central journal article supplement (PMC7010282; doi:10.1371/journal.pone.0228713), 2020-02-10
Supplement: pone.0228713.s006.pdf [file pone.0228713.s006.pdf]

## Percentage of articles by main field in Scopus and Wikipedia and its differences

| Main field                                                              | Scopus* | Wikipedia | Difference |
|-------------------------------------------------------------------------|---------|-----------|------------|
| Agricultural and Biological Sciences                                    | 4.64%   | 9.36%     | 4.72%      |
| Arts and Humanities                                                     | 2.69%   | 3.45%     | 0.76%      |
| Biochemistry, Genetics and Molecular Biology                            | 8.92%   | 19.78%    | 10.86%     |
| Business, Management and Accounting                                     | 1.13%   | 0.55%     | -0.58%     |
| Chemical Engineering                                                    | 2.44%   | 1.32%     | -1.12%     |
| Chemistry                                                               | 5.96%   | 3.21%     | -2.75%     |
| Computer Science                                                        | 2.29%   | 1.25%     | -1.04%     |
| Decision Sciences                                                       | 0.44%   | 0.31%     | -0.13%     |
| Dentistry                                                               | 0.42%   | 0.18%     | -0.24%     |
| Earth and Planetary Sciences                                            | 2.60%   | 4.71%     | 2.11%      |
| Economics, Econometrics and Finance                                     | 0.86%   | 0.74%     | -0.12%     |
| Energy                                                                  | 1.24%   | 0.27%     | -0.97%     |
| Engineering                                                             | 7.90%   | 1.41%     | -6.49%     |
| Environmental Science                                                   | 2.97%   | 2.27%     | -0.70%     |
| Health Professions                                                      | 0.77%   | 0.43%     | -0.34%     |
| Immunology and Microbiology                                             | 2.13%   | 4.01%     | 1.88%      |
| Materials Science                                                       | 5.03%   | 0.98%     | -4.05%     |
| Mathematics                                                             | 2.75%   | 1.53%     | -1.22%     |
| Medicine                                                                | 24.22%  | 20.46%    | -3.76%     |
| Multidisciplinary                                                       | 0.99%   | 5.36%     | 4.37%      |
| Neuroscience                                                            | 1.76%   | 3.10%     | 1.34%      |
| Nursing                                                                 | 1.12%   | 0.66%     | -0.46%     |
| Pharmacology, Toxicology and Pharmaceutics                              | 2.93%   | 2.50%     | -0.43%     |
| Physics and Astronomy                                                   | 6.87%   | 4.74%     | -2.13%     |
| Psychology                                                              | 1.53%   | 2.52%     | 0.99%      |
| Social Sciences                                                         | 4.78%   | 4.59%     | -0.19%     |
| Veterinary                                                              | 0.60%   | 0.33%     | -0.27%     |
| <i>*total of 62 821 260 scientific articles indexed in the database</i> |         |           |            |
