# Supplementary material for: Science through Wikipedia: A novel representation of open knowledge through co-citation networks
Source: PubMed Central journal article supplement (PMC7010282; doi:10.1371/journal.pone.0228713), 2020-02-10
Supplement: pone.0228713.s007.pdf [file pone.0228713.s007.pdf]

## Top 25 most cited fields with local measures of centrality

| Field                                                | Cites   | Articles | Closeness | Betweenness | Degree | Eigenvector |
|------------------------------------------------------|---------|----------|-----------|-------------|--------|-------------|
| General Medicine                                     | 108 131 | 78 115   | 0.386     | 0.860       | 130    | 1000        |
| Molecular Biology                                    | 98 118  | 70 485   | 0.334     | 0.492       | 24     | 0.145       |
| Biochemistry                                         | 78 704  | 60 917   | 0.262     | 0.163       | 5      | 0.027       |
| Genetics                                             | 77 920  | 42 313   | 0.251     | 0.006       | 2      | 0.017       |
| Multidisciplinary                                    | 72 346  | 38 422   | 0.261     | 0.143       | 5      | 0.024       |
| Ecology, Evolution, Behavior and Systematics         | 72 079  | 43 699   | 0.294     | 0.180       | 29     | 0.154       |
| Cell Biology                                         | 65 788  | 48 948   | 0.251     | 0.000       | 1      | 0.015       |
| General Biochemistry, Genetics and Molecular Biology | 39 606  | 24 290   | 0.251     | 0.000       | 1      | 0.015       |
| Space and Planetary Science                          | 33 956  | 14 266   | 0.208     | 0.024       | 4      | 0.007       |
| Astronomy and Astrophysics                           | 31 704  | 12 657   | 0.172     | 0.000       | 1      | 0.002       |
| General Agricultural and Biological Sciences         | 27 194  | 16 185   | 0.228     | 0.000       | 1      | 0.017       |
| Animal Science and Zoology                           | 25 600  | 15 293   | 0.228     | 0.000       | 1      | 0.017       |
| Genetics (clinical)                                  | 24 106  | 11 328   | 0.201     | 0.000       | 1      | 0.003       |
| Pharmacology                                         | 21 429  | 16 702   | 0.279     | 0.000       | 1      | 0.086       |
| General Chemistry                                    | 21 037  | 16 595   | 0.215     | 0.146       | 22     | 0.042       |
| Plant Science                                        | 20 398  | 12 282   | 0.228     | 0.006       | 2      | 0.018       |
| Psychiatry and Mental health                         | 18 069  | 14 595   | 0.314     | 0.339       | 14     | 0.113       |
| History                                              | 17 742  | 13 019   | 0.158     | 0.042       | 8      | 0.016       |
| Immunology                                           | 17 427  | 13 900   | 0.279     | 0.000       | 1      | 0.086       |
| Microbiology                                         | 17 233  | 13 123   | 0.279     | 0.000       | 1      | 0.086       |
| General Neuroscience                                 | 16 933  | 12 549   | 0.251     | 0.006       | 2      | 0.017       |
| Sociology and Political Science                      | 16 592  | 12 919   | 0.187     | 0.237       | 18     | 0.036       |
| Clinical Neurology                                   | 15 473  | 12 816   | 0.279     | 0.000       | 1      | 0.086       |
| General Physics and Astronomy                        | 14 770  | 10 927   | 0.211     | 0.100       | 9      | 0.016       |
| Physiology                                           | 14 725  | 10 973   | 0.279     | 0.000       | 1      | 0.086       |
| Cancer Research                                      | 14 643  | 11 860   | 0.251     | 0.000       | 1      | 0.015       |
| Infectious Diseases                                  | 13 761  | 10 860   | 0.279     | 0.000       | 1      | 0.086       |
