# Supplementary material for: Science through Wikipedia: A novel representation of open knowledge through co-citation networks
Source: PubMed Central journal article supplement (PMC7010282; doi:10.1371/journal.pone.0228713), 2020-02-10
Supplement: pone.0228713.s008.pdf [file pone.0228713.s008.pdf]

## Comparison of the most cited journals on Wikipedia and Altmetric.com

| Journal                                                                         | Wikipedia Mentions | Journal                                                                         | Altmetric Mentions |
|---------------------------------------------------------------------------------|--------------------|---------------------------------------------------------------------------------|--------------------|
| Nature                                                                          | 34 424             | Nature                                                                          | 6 847 973          |
| Proceedings of the National Academy of Sciences of the United States of America | 28 276             | Science                                                                         | 2 879 553          |
| Science                                                                         | 24 758             | New England Journal of Medicine                                                 | 1 754 603          |
| Journal of Biological Chemistry                                                 | 22 174             | British Medical Journal                                                         | 1 726 136          |
| PLoS ONE                                                                        | 12 705             | Proceedings of the National Academy of Sciences of the United States of America | 1 644 974          |
| The Astrophysical Journal                                                       | 11 298             | PLoS ONE                                                                        | 1 638 487          |
| Zookeys                                                                         | 9 038              | JAMA: Journal of the American Medical Association                               | 1 261 491          |
| Genome Research                                                                 | 8 894              | The Lancet                                                                      | 1 181 206          |
| Cell                                                                            | 7 768              | Scientific Reports                                                              | 931 194            |
| Astronomy and Astrophysics                                                      | 7 149              | Nature Communications                                                           | 895 397            |
| Journal of the American Chemical Society                                        | 6 790              | Cell                                                                            | 502 674            |
| The Lancet                                                                      | 6 630              | IEEE Spectrum                                                                   | 470 470            |
| British Medical Journal                                                         | 6 468              | JAMA Internal Medicine                                                          | 463 672            |
| Nucleic Acids Research                                                          | 6 027              | British Journal of Sports Medicine                                              | 357 935            |
| Physical Review Letters                                                         | 5 896              | Scientific American                                                             | 335 845            |
| International Journal of Systematic and Evolutionary Microbiology               | 5 887              | Annals of Internal Medicine                                                     | 305 525            |
| New England Journal of Medicine                                                 | 5 864              | Science Advances                                                                | 300 097            |
| Nature Genetics                                                                 | 5 324              | Current Biology                                                                 | 289 391            |
| Biochemical & Biophysical Research Communications                               | 5 098              | Nature Medicine                                                                 | 269 194            |
| The Astronomical Journal                                                        | 4 932              | Pediatrics                                                                      | 267 039            |
| <i>**Data retrieved from Altmetric Explorer in 4 December 2019</i>              |                    |                                                                                 |                    |
